# Supplementary material
Source: PubMed Central journal article supplement (PMC6542271)
Supplement: NIHMS1030752-supplement-Supplemental.pdf [file NIHMS1030752-supplement-Supplemental.pdf]

## SUPPLEMENTARY INFORMATION

### One-Pot Production of RNA Nanoparticles *via* Automated Processing and Self Assembly

*Daniel L. Jasinski<sup>1, †</sup>, Daniel W. Binzel<sup>1, †</sup>, and Peixuan Guo<sup>1\*</sup>*

Center for RNA Nanobiotechnology and Nanomedicine; College of Pharmacy, Division of Pharmaceutics and Pharmaceutical Chemistry; College of Medicine, Department of Physiology & Cell Biology; Dorothy M. Davis Heart and Lung Research Institute; and James Comprehensive Cancer Center, The Ohio State University, Columbus, Ohio 43210, USA.

† These authors contributed equally to this work

**Keywords:** rolling circle transcription, RNA nanoparticles, pRNA 3WJ motif, nanotechnology, nanobiotechnology

## Supplemental Figure 1: Sequence Design and Ribozyme Optimization

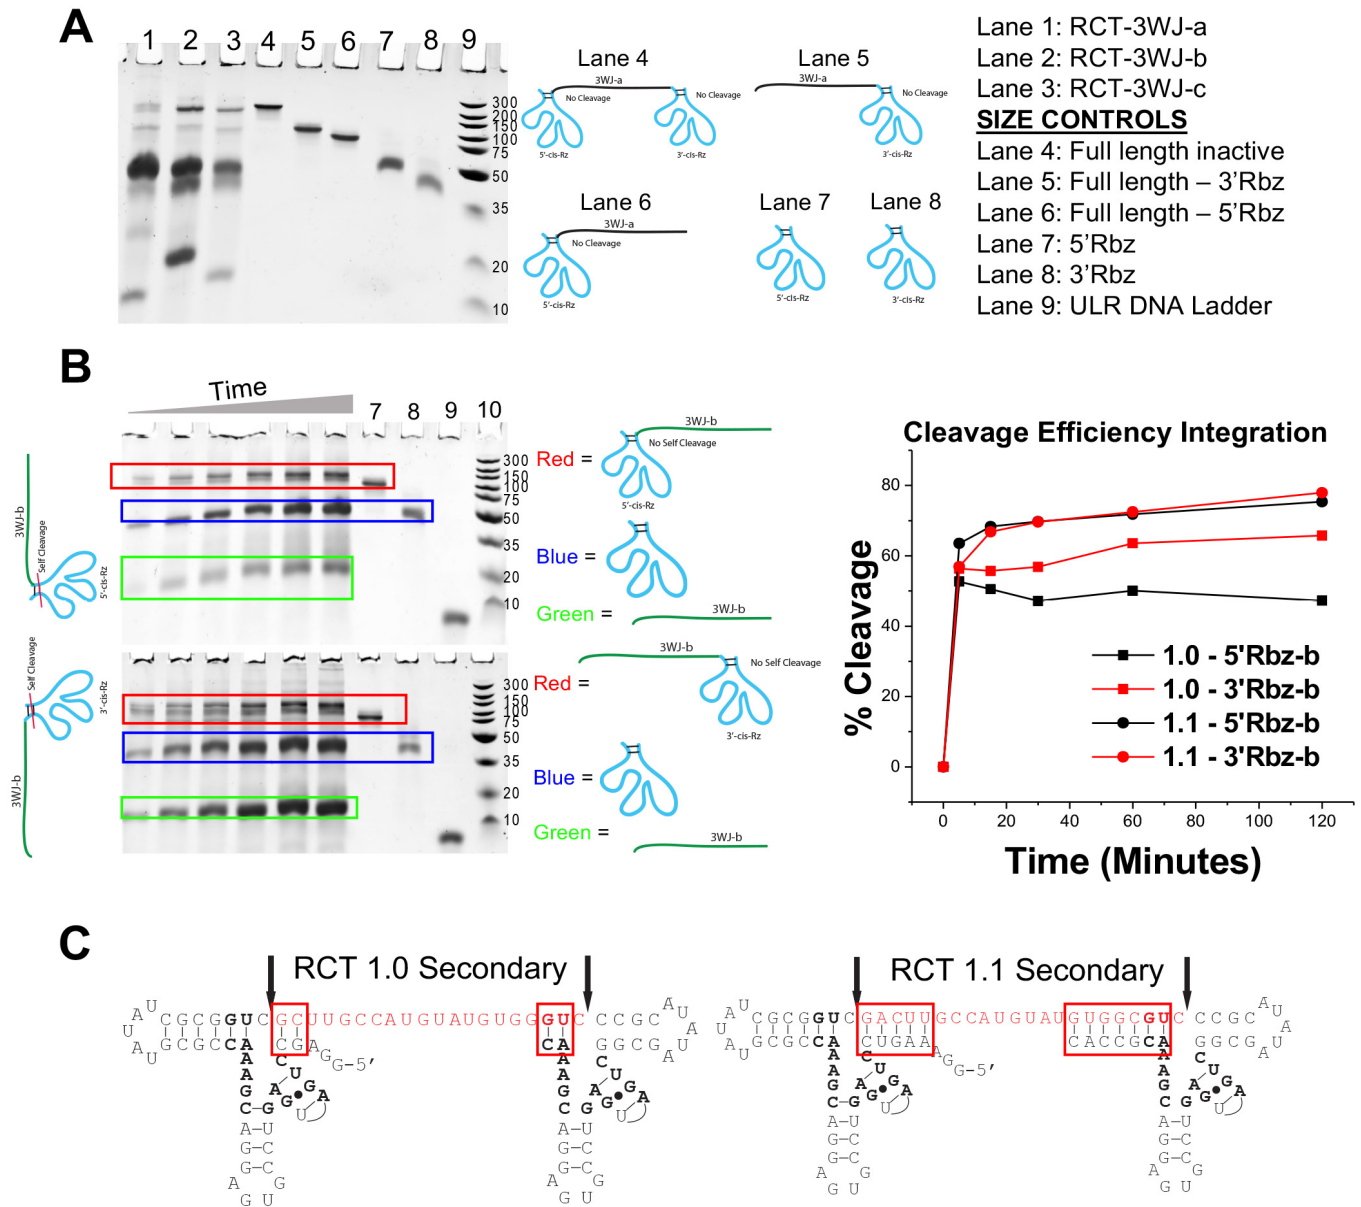

**Supp Fig 1. (A)** PAGE analysis shows active RCT constructs along with size controls of inactivated ribozyme constructs. Size controls allow confirmation of ribozyme cleavage and release of target RNA oligomers. **(B)** Typical experiment ran to determine cleavage efficiency of self-cleaving ribozymes. The target sequence (green box) intensity was added with the cleaved ribozyme (blue box) intensity and then divided by the total band intensity (red + blue + green box) per well. A plot on the right shows the ribozyme cleavage efficiency over time, comparing first generation design (RCT-1.0) to the second generation design (RCT-1.1). The construct containing 3WJ-b sequence is shown here. While a better curve was desired for ribozyme cleavage kinetics, ribozymes self-cleavage as they are being transcribed, making it difficult to obtain time points of low percentage cleavage. **(C)** An increase in ribozyme efficiency is attributed to increasing the length of the duplex in the “closing” region of the ribozyme sequence, shown in red boxes.

## Supplemental Figure 2. Assembly of Circ dsDNA Constructs

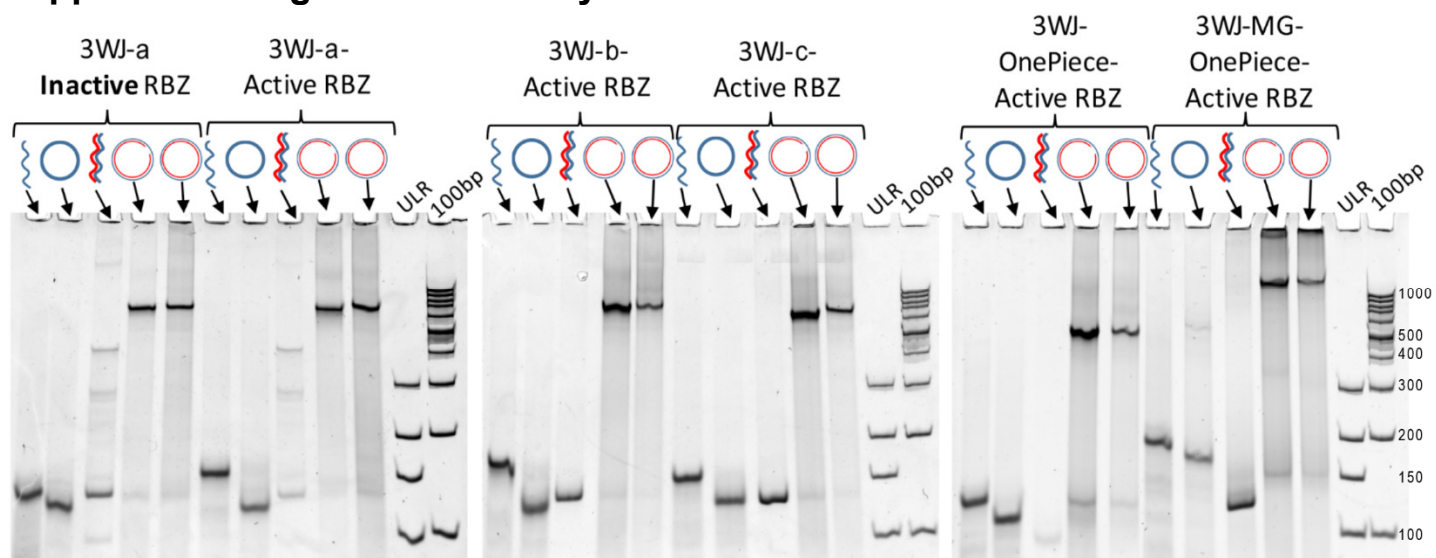

**Supp Fig 2.** PAGE analyzing the assembly of circular dsDNA constructs containing the T7 promoter used for transcription reactions.

## Supplemental Figure 3. Active Ribozyme Constructs, Assembly of Pure Fragments

**A**

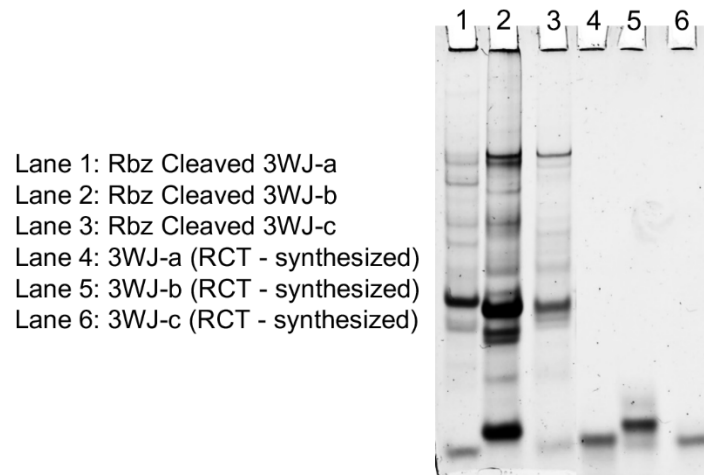

**B**

|           | 1 | 2 | 3 | 4 | 5 | 6 | 7 |
|-----------|---|---|---|---|---|---|---|
| RCT-3WJ-a | + |   |   | + |   | + | + |
| RCT-3WJ-b |   | + |   | + | + |   | + |
| RCT-3WJ-c |   |   | + |   | + | + | + |

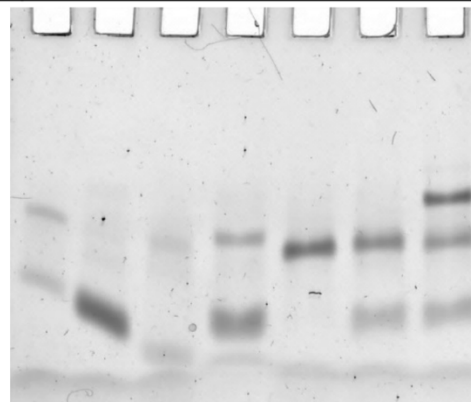

**Supp Fig 3. (A)** Ribozyme cleaved 3WJ ssRNA oligomers were compared to chemically synthesized sequences identical to those of the target sequence. Evidenced by identical migration rate, we can conclude that the cleaved RNA oligomers are the same size as chemically synthesized controls. **(B)** RCT cleaved 3WJ ssRNA oligomers were purified by PAGE band isolation. After elution from gel pieces assembly was tested on native PAGE. A stepwise assembly from monomer to dimer and finally trimer complex demonstrate the ssRNA from RCT reactions are indeed the correct sequence.

## Supplemental Figure 4. Fitting Comparison of Concentrations of Transcription Monitoring Experiment

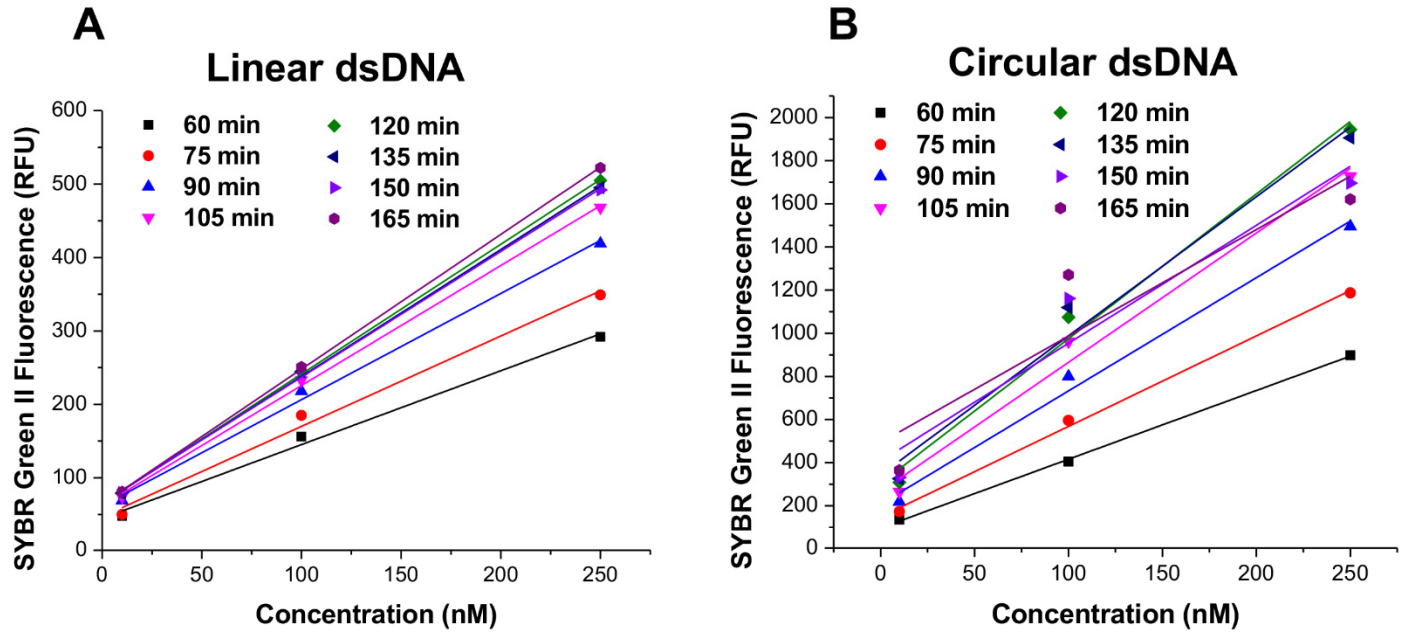

**C**

|         | Linear dsDNA |                |           |                |           | Circular |                |           |                |           |
|---------|--------------|----------------|-----------|----------------|-----------|----------|----------------|-----------|----------------|-----------|
|         | Slope        | Standard Error | Intercept | Standard Error | R-Squared | Slope    | Standard Error | Intercept | Standard Error | R-Squared |
| 60 min  | 1.01         | 0.08           | 44.68     | 12.10          | 0.99      | 3.19     | 0.08           | 97.30     | 12.28          | 1.00      |
| 75 min  | 1.23         | 0.11           | 47.03     | 16.77          | 0.98      | 4.20     | 0.20           | 148.49    | 31.34          | 1.00      |
| 90 min  | 1.45         | 0.08           | 61.78     | 13.01          | 0.99      | 5.25     | 0.48           | 207.95    | 74.42          | 0.98      |
| 105 min | 1.63         | 0.05           | 62.25     | 8.25           | 1.00      | 5.99     | 0.70           | 265.61    | 108.79         | 0.97      |
| 120 min | 1.77         | 0.03           | 64.63     | 4.12           | 1.00      | 6.71     | 0.72           | 303.90    | 111.35         | 0.98      |
| 135 min | 1.73         | 0.04           | 65.40     | 6.60           | 1.00      | 6.45     | 0.94           | 343.37    | 147.00         | 0.96      |
| 150 min | 1.71         | 0.04           | 65.95     | 5.50           | 1.00      | 5.47     | 1.50           | 406.92    | 232.78         | 0.86      |
| 165 min | 1.83         | 0.02           | 64.54     | 3.39           | 1.00      | 4.94     | 2.05           | 493.18    | 318.93         | 0.71      |

**Supp Fig 4. (A/B)** Plots and linear fitting of DNA template concentration, x-axis, *versus* RNA output, as monitored by SYBR GreenII fluorescence. **(C)** Values of slope and intercept, along with their standard errors and R-Squared values of the fits.

## Supplemental Table 1. Table of Ribozyme Cleavage Efficiency

|                             | <b>RCT 1.0</b> |        | <b>RCT 1.1</b>    |        |
|-----------------------------|----------------|--------|-------------------|--------|
|                             | <b>3WJ-a</b>   |        | <b>3WJ-a</b>      |        |
| Time (minutes)              | 5' Rbz         | 3' Rbz | 5'Rbz             | 3'Rbz  |
| 0                           | 0.00%          | 0.00%  | 0.00%             | 0.00%  |
| 5                           | 56.7%          | 25.6%  | 55.48%            | 43.54% |
| 15                          | 60.0%          | 35.5%  | 61.97%            | 50.35% |
| 30                          | 61.4%          | 37.6%  | 64.04%            | 50.93% |
| 60                          | 62.9%          | 49.7%  | 64.22%            | 57.94% |
| 120                         | 65.7%          | 53.3%  | 68.12%            | 71.86% |
|                             | <b>3WJ-b</b>   |        | <b>3WJ-b</b>      |        |
| Time (minutes)              | 5'Rbz          | 3'Rbz  | 5'Rbz             | 3'Rbz  |
| 0                           | 0.00%          | 0.00%  | 0.00%             | 0.00%  |
| 5                           | 52.69%         | 56.35% | 63.53%            | 56.91% |
| 15                          | 50.55%         | 55.70% | 68.33%            | 66.85% |
| 30                          | 47.18%         | 56.83% | 69.77%            | 69.66% |
| 60                          | 50.08%         | 63.56% | 71.88%            | 72.48% |
| 120                         | 47.25%         | 65.77% | 75.37%            | 77.99% |
|                             | <b>3WJ-c</b>   |        | <b>3WJ-C</b>      |        |
| Time (minutes)              | 5'Rbz          | 3'Rbz  | 5'Rbz             | 3'Rbz  |
| 0                           | 0.00%          | 0.00%  | 0.00%             | 0.00%  |
| 5                           | 16.18%         | 15.80% | 47.43%            | 45.38% |
| 15                          | 20.89%         | 16.15% | 55.98%            | 52.39% |
| 30                          | 22.21%         | 24.59% | 56.82%            | 56.94% |
| 60                          | 25.80%         | 30.05% | 58.45%            | 59.93% |
| 120                         | 30.20%         | 36.72% | 65.35%            | 64.66% |
| <b>Full Length Cleavage</b> |                |        |                   |        |
| <b>Construct</b>            |                |        | <b>Cleavage %</b> |        |
| RCT-1.1-3WJ-a               |                |        | 87.12%            |        |
| RCT-1.1-3WJ-b               |                |        | 85.76%            |        |
| RCT-1.1-3WJ-c               |                |        | 80.83%            |        |

**Supp Table 1.** Table summarizing the cleavage efficiencies of the ribozyme in each of the sequences, broken, down for 5' and 3' ribozyme of each sequence, as well as total cleavage efficiency of the full length constructs (those containing both 5' and 3' ribozymes).





## Supplemental Table 3. Table of DNA Sequences Used

| <b>Sequences for Linear dsDNA</b>   |                                                                                                                                                                       |
|-------------------------------------|-----------------------------------------------------------------------------------------------------------------------------------------------------------------------|
|                                     | Promoter, 5'Ribozyme, 3WJ Target RNA, 3'Ribozyme                                                                                                                      |
| RCT-1.0-3WJ-a                       | TAATACGACTCACTATAGGAGCCTGATGAGTCCGTGAGGACGAAACCGCGTATATCGCGGTCGCTTGCCATGTG<br>TATGTGGGGTCCGCGTATATCGCGCCTGATGAGTCCGTGAGGACGAAAC                                       |
| RCT-1.0-3WJ-b                       | TAATACGACTCACTATAGGAGCCTGATGAGTCCGTGAGGACGAAACCGCGTATATCGCGGTCGCCCCACATACT<br>TTGTTGATCCGTCGCGCGTATATCGCGCCTGATGAGTCCGTGAGGACGAAAC                                    |
| RCT-1.0-3WJ-c                       | TAATACGACTCACTATAGGAGCCTGATGAGTCCGTGAGGACGAAACCGCGTATATCGCGGTCGCGGATCAATCA<br>TGGCAAGTCGCGCGTATATCGCGCCTGATGAGTCCGTGAGGACGAAAC                                        |
| RCT-1.0-3WJ-a-InactiveRbz           | TAATACGACTCACTATAGGAGCCTAATGAGTCCGTGAGGACGAAACCGCGTATATCGCGGTCGCTTGCCATGTG<br>TATGTGGGGTCCGCGTATATCGCGCCTAATGAGTCCGTGAGGACGAAAC                                       |
| RCT-1.1-3WJ-a                       | TAATACGACTCACTATAGGAAAGTCCTGATGAGTCCGTGAGGACGAAACCGCGTATATCGCGGTCGACTTGCCA<br>TGTGTATGTGGCGTCCCGCATATAGCGGCTGATGAGTCCGTGAGGACGAAACGCCAC                               |
| RCT-1.1-3WJ-b                       | TAATACGACTCACTATAGGAGCGTCCTGATGAGTCCGTGAGGACGAAACCGCGTATATCGCGGTCGACGCCACA<br>TACTTTGTTGATCCGTCGCCGCATATAGCGGCTGATGAGTCCGTGAGGACGAAACGGATC                            |
| RCT-1.1-3WJ-c                       | TAATACGACTCACTATAGGACCGTCCTGATGAGTCCGTGAGGACGAAACCGCGTATATCGCGGTCGACGGATCA<br>ATCATGGCAAGTCCCGCATATAGCGGCTGATGAGTCCGTGAGGACGAAACTTGCC                                 |
| RCT-1.1-3WJ-a-InactiveRbz           | TAATACGACTCACTATAGGAAAGTCCTAATGAGTCCGTGAGGACGAAACCGCGTATATCGCGGTCGACTTGCCAT<br>GTGTATGTGGCGTCCCGCATATAGCGGCTAATGAGTCCGTGAGGACGAAACGCCAC                               |
| RCT-Mut-2'F-Activity-Test           | TAATACGACTCACTATAGGAGCGTCCTGATGAGTCCGTGAGGACGAAACCGCGTATATCGCGGTAGACGCCACA<br>TACTTTGTTGATCCGTACCGCATATAGCGGCTGATGAGTCCGTGAGGACGAAACGGATC                             |
| <b>Sequences for Circular dsDNA</b> |                                                                                                                                                                       |
|                                     | Promoter, 5'Ribozyme, 3WJ Target RNA, 3'Ribozyme                                                                                                                      |
| RCT_1.1_3WJ-a_IN_Circ_AntiSense     | Phos-ATAGTGAGTCGTATTAGTGGCGTTTCGTCTCACGGACTCATTAGCCGCTATATGCGGGA<br>CGCCACATACACATGGCAAGTCGACCGCGATATACGCGTTTCGTCTCACGGACTCATTAGGACTTTCCCT                            |
| RCT_1.1_3WJ-a_IN_Circ_Sense         | Phos-AGGAAAGTCCTAATGAGTCCGTGAGGACGAAACCGCGTATATCGCGGTCGACTTGCCATGT<br>GTATGTGGCGTCCCGCATATAGCGGCTAATGAGTCCGTGAGGACGAAACGCCACTAATACGACTCACTAT                          |
| RCT_1.1_3WJ-a_Circ_AntiSense        | Phos-ATAGTGAGTCGTATTAGTGGCGTTTCGTCTCACGGACTCATCAGCCGCTATATGCGGGA<br>CGCCACATACACATGGCAAGTCGACCGCGATATACGCGTTTCGTCTCACGGACTCATCAGGACTTTCCCT                            |
| RCT_1.1_3WJ-a_Circ_Sense            | Phos-AGGAAAGTCCTGATGAGTCCGTGAGGACGAAACCGCGTATATCGCGGTCGACTTGCCATGT<br>GTATGTGGCGTCCCGCATATAGCGGCTGATGAGTCCGTGAGGACGAAACGCCACTAATACGACTCACTAT                          |
| RCT_1.1_3WJ-b_Circ_AntiSense        | Phos-ATAGTGAGTCGTATTAGATCCGTTTCGTCTCACGGACTCATCAGCCGCTATATGCGGGACGG<br>ATCAACAAAGTATGTGGCGTCGACCGCGATATACGCGTTTCGTCTCACGGACTCATCAGGACGCTCCT                           |
| RCT_1.1_3WJ-b_Circ_Sense            | Phos-AGGAGCGTCCTGATGAGTCCGTGAGGACGAAACCGCGTATATCGCGGTCGACGCCACATACTT<br>TGTTGATCCGTCGCCGCATATAGCGGCTGATGAGTCCGTGAGGACGAAACGGATCTAATACGACTCACTAT                       |
| RCT_1.1_3WJ-c_Circ_AntiSense        | Phos-ATAGTGAGTCGTATTAGGCAAGTTTCGTCTCACGGACTCATCAGCCGCTATATGCGGGA<br>CTTGCCATGATTGATCCGTCGACCGCGATATACGCGGTTTCGTCTCACGGACTCATCAGGACGGTCCCT                             |
| RCT_1.1_3WJ-c_Circ_Sense            | Phos-AGGACCGTCCTGATGAGTCCGTGAGGACGAAACCGCGTATATCGCGGTCGACGGATCAAT<br>CATGGCAAGTCCCGCATATAGCGGCTGATGAGTCCGTGAGGACGAAACTTGCCCTAATACGACTCACTAT                           |
| 3WJ_OnePiece_Circ_AntiSense         | Phos-ATAGTGAGTCGTATTACGCGGTTTCGTCTCACGGACTCATCAGTTGCCAT<br>GATTGATCCTCTCGGATCAACAAAGTATGTGGCTCTCGCCACATACACATGGCAAGACCGCGTCCCT                                        |
| 3WJ_OnePiece_Circ_Sense             | Phos-AGGGACGCGGCTTTGCCATGTGTATGTGGCGGAGAGCCACATACTTTGTTGATCCG<br>AGAGGATCAATCATGGCAACTGATGAGTCCGTGAGGACGAAACCGCGTAATACGACTCACTAT                                      |
| MG-3WJ_OnePiece_AntiSense           | Phos-ATAGTGAGTCGTATTACGCGGTTTCGTCTCACGGACTCATCAGTTGCCATGATTGATCCTCT<br>CGGATCAACAAAGTATGTGGCGGATCCATTGTTACCTGGCTCTCGCCAGTCGGGATCCGCCA<br>CATACACATGGCAAGACCGCGTCCCT   |
| MG-3WJ_OnePiece_Circ_Sense          | Phos-AGGGACGCGGCTTTGCCATGTGTATGTGGCGGATCCCGACTGGCGAGAGCCAGGTAACG<br>AATGGATCCGCCACATACTTTGTTGATCCGAGAGGATCAATCATGGCAACTGATGAGTCCGTGA<br>GGACGAAACCGCGTAATACGACTCACTAT |
| <b>3WJ Sequences</b>                |                                                                                                                                                                       |
| 3WJ-a-RCT                           | GACUUGCCAUGUGUAUGUGGCGUC                                                                                                                                              |
| 3WJ-b-RCT                           | GACGCCACAUACUUUGUAUCCGUC                                                                                                                                              |
| 3WJ-c-RCT                           | GACGGAUCAUAUGGCAAGUC                                                                                                                                                  |
